# Supplementary material for: The Role of Medication Beliefs in COVID-19 Vaccine and Booster Uptake in Healthcare Workers: An Exploratory Study
Source: MDPI journal article supplement (doi:10.3390/healthcare11131967), 2023-07-07
Supplement: s1 [file s1]

**Supplementary Material S1 – Table of questions relevant to each construct of the BMQ**

**Table 1: Relevant questions for each construct of the BMQ[25]**

| Measure      | Construct          | Total Score | Relevant Questions |
|--------------|--------------------|-------------|--------------------|
| BMQ-Specific | Specific Concerns  | 25          | 2, 5, 6, 8 & 9     |
|              | Specific Necessity | 25          | 1, 2, 4, 7 & 10    |
| BMQ-General  | General Overuse    | 20          | 1, 3, 7, & 8       |
|              | General Harm       | 20          | 2, 4, 5, & 6       |

## Supplementary Material S2 – The relationship between Vaccine Uptake and Vaccine Hesitancy

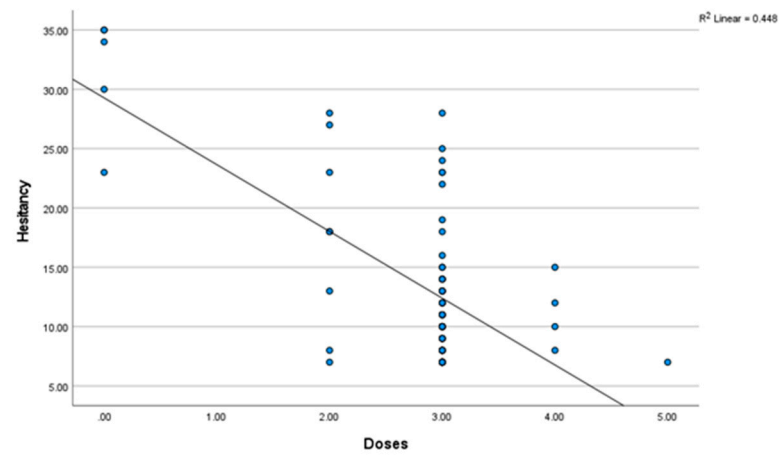

Figure 1. Scatter Plot showing the correlation between Vaccine Hesitancy and Vaccine Uptake (n=82)

### Supplementary Material S3: The Relationship between Age and Vaccine Hesitancy

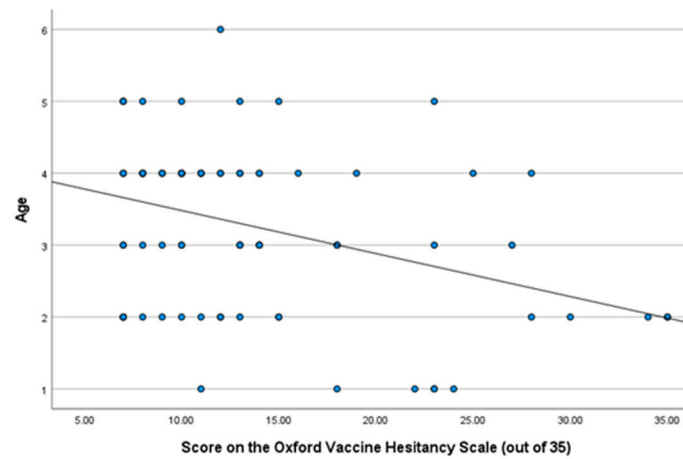

*Figure 2. Scatter Graph showing the relationship between Age and Vaccine Hesitancy Scores out of 35 (A higher score indicating greater degree of hesitancy).*

# **Supplementary Material S4 – Demographic Variables in the Sample.**

**Table 2. Percentage and Frequency of Demographic Categories in the Sample. Fully vaccinated indicates receipt of 3 or more doses of the COVID-19 vaccine. (n=82).**

| <b>Age Range (years)</b>          | <b>N = (Percentage)</b> | <b>Percentage Fully Vaccinated</b> |
|-----------------------------------|-------------------------|------------------------------------|
| 18-25                             | 6 (7.31)                | 50%                                |
| 26-35                             | 18 (21.9)               | 66.7%                              |
| 36-45                             | 16 (19.5)               | 81.3%                              |
| 46-55                             | 32 (39.1)               | 97%                                |
| 56-65                             | 8 (9.75)                | 100%                               |
| 65+                               | 1 (1.21)                | 100%                               |
| <b>Gender</b>                     | <b>N = (Percentage)</b> | <b>Percentage Fully Vaccinated</b> |
| Female                            | 65 (79.3%)              | 71.6%                              |
| Male                              | 17 (20.7%)              | 94.1%                              |
| <b>Ethnicity</b>                  | <b>N = (Percentage)</b> | <b>Percentage Fully Vaccinated</b> |
| White British                     | 71 (86.6)               | 84.5%                              |
| Asian Indian                      | 4 (4.87)                | 75%                                |
| White European                    | 2 (2.43)                | 66.7%                              |
| Asian Filipino                    | 1 (1.21)                | 100%                               |
| Black African                     | 1 (1.21)                | 100%                               |
| Mauritian                         | 1 (1.21)                | 100%                               |
| Arabic                            | 1 (1.21)                | 100%                               |
| <b>Profession</b>                 | <b>N = (Percentage)</b> | <b>Percentage Fully Vaccinated</b> |
| Nurse                             | 40 (48.7)               | 92.5%                              |
| Operating Department Practitioner | 11 (13.41)              | 90%                                |
| Healthcare Assistant              | 10 (12.2)               | 40%                                |
| Pharmacist                        | 8 (9.75)                | 100%                               |
| Doctor                            | 7 (8.53)                | 75%                                |
| Care Worker                       | 3 (3.65)                | 87.5%                              |
| Pharmacy Technician               | 2 (2.43)                | 50%                                |
| <b>Location</b>                   | <b>N = (Percentage)</b> | <b>Percentage Fully Vaccinated</b> |
| Channel Islands                   | 46 (56.10)              | 89.2%                              |
| England                           | 23 (28.0)               | 78.3%                              |

|             |           |      |
|-------------|-----------|------|
| Wales       | 12 (14.6) | 75%  |
| Isle Of Man | 1 (1.21)  | 100% |

#### **Supplementary Material S4: Distribution of Scores in the Independent Variables**

Whilst scores for BMQ-Necessity (Figure 1), BMQ-Concerns (Figure 2), BMQ-Harm (Figure 4) and BIPQ (Figure 7) were normally distributed, scores for BMQ-Overuse (Figure 5) and Vaccine Hesitancy (Figure 6) had a positive skew, meaning lower scores were more common for these measures. The distribution of Necessity-Concerns differentials had a negative skew, meaning higher scores (indicating higher necessity than concern) were more common. Descriptive statistics and Cronbach's alpha scores for the Independent Variables in the model can be found in Table S3.

**Table 3. Descriptive Statistics and Cronbach's alpha scores of the Predictors used in the Model (n=82).**

|                   | <b>Min.</b> | <b>Max.</b> | <b>Mean</b>   | <b>S.E.</b> | <b>Cronbach's <math>\alpha</math></b> |
|-------------------|-------------|-------------|---------------|-------------|---------------------------------------|
| BMQ-Necessity     | 6.00        | 25.00       | 16.79 / 25.00 | 0.518       | 0.899                                 |
| BMQ-Concerns      | 3.00        | 19.00       | 10.82 / 25.00 | 0.418       | 0.764                                 |
| NCD               | -13.00      | 20.00       | 5.93 / 25.00  | 7.112       | N/A                                   |
| BMQ-Harm          | 4.00        | 17.00       | 8.23 / 20.00  | 0.309       | 0.724                                 |
| BMQ-Overuse       | 4.00        | 17.00       | 7.50 / 20.00  | 0.394       | 0.855                                 |
| BIPQ              | 18.00       | 69.00       | 46.52 / 88.00 | 1.196       | 0.744                                 |
| Vaccine Hesitancy | 7.00        | 35.00       | 13.56 / 35.00 | 0.782       | 0.925                                 |

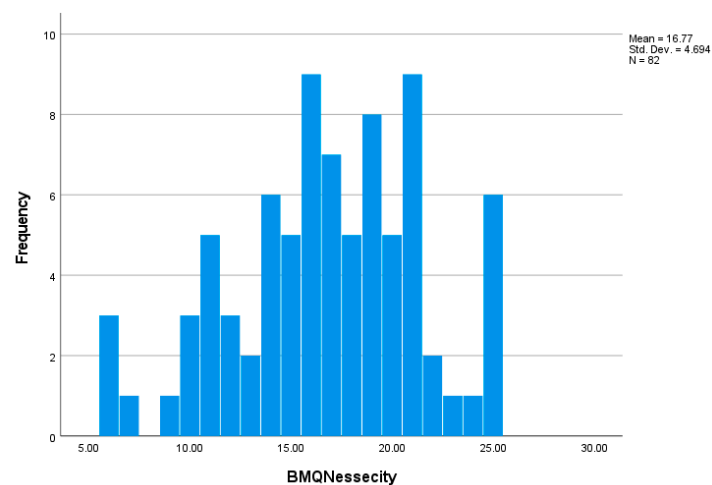

*Figure 3. Histogram showing the distribution of BMQ-Necessity Scores*

The range of BMQ-Necessity Scores was 6.00 - 25.00, with 59.8% being above the midpoint and 40.2% being below the midpoint.

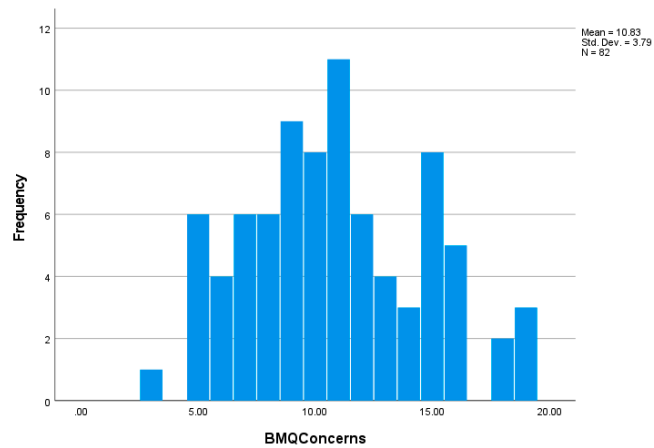

Figure 4. Histogram showing the distribution of BMQ-Concerns Scores

The range of BMQ-Concerns Scores was 3.00 - 19.00, with 45.1% being above the midpoint and 54.9% being below the midpoint.

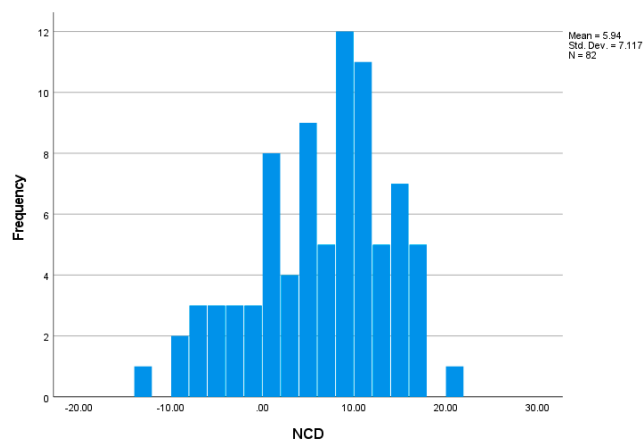

Figure 5. Histogram showing the distribution of Necessity-Concerns Differentials

The range of Necessity-Concerns Differentials was -13.00 - 20.00, with 58.5% being above the midpoint and 41.5% being below the midpoint.

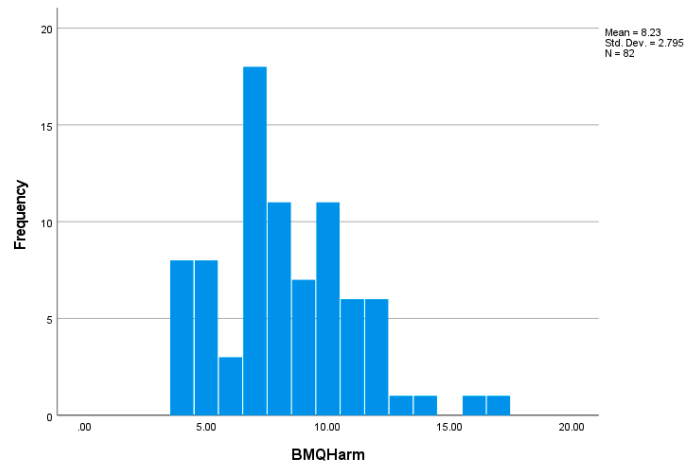

Figure 6. Histogram showing the distribution of BMQ-Harm Scores

The range of BMQ-Harm Scores was 4.00 - 17.00, with 13.4% being above the midpoint and 86.6% being below the midpoint.

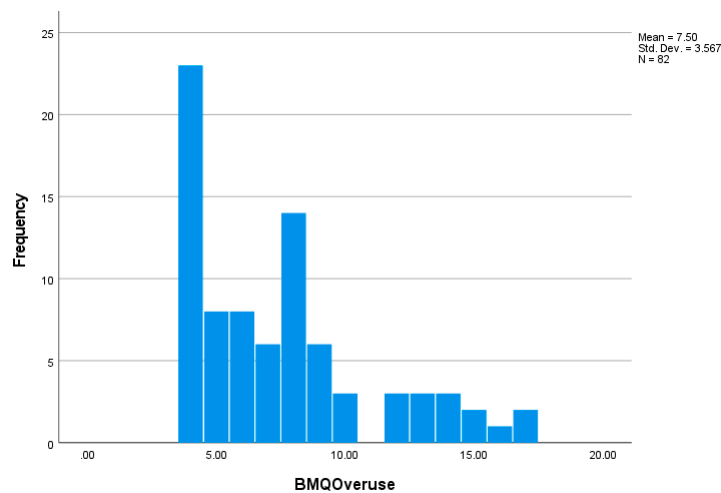

Figure 7. Histogram showing the distribution of BMQ-Overuse Scores

The range of BMQ-Overuse Scores was 4.00 - 17.00, with 17.1% being above the midpoint and 82.9% being below the midpoint.



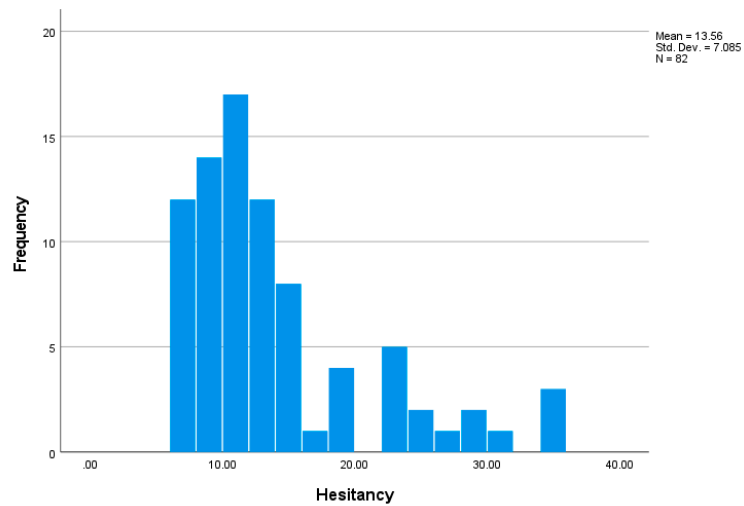

Figure 8. Histogram showing the distribution of Vaccine Hesitancy Scores

The range of Vaccine Hesitancy Scores was 7.00 - 35.00, with 17.1% being above the midpoint and 82.9% being below the midpoint.

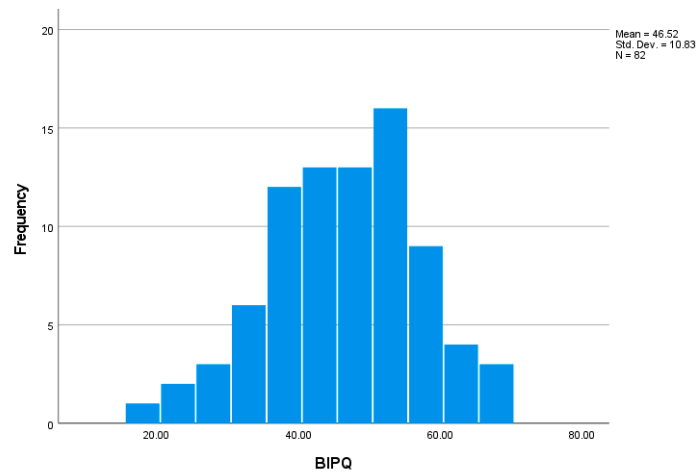

Figure 9. Histogram showing the distribution of BIPQ Scores

The range of BIPQ Scores was 18.00 - 69.00, with 39.0% being above the midpoint and 61.0% being below the midpoint.

### **Supplementary Material S5: Coefficients of predictors in the model from the Logistic Regression**

A bivariate logistic regression was performed to assess the power of the model in predicting delay or no delay for all doses.

At Block 0 overall accuracy was 59.5% (0% for predicted “Delay” and 100% for predicted “No delay”). The model was not a significant contribution to predicting Delay ( $X^2=4.119$ , d.f. = 6,  $p = 0.661$ ) accounting for between 5.4% and 7.3% of the variance in the DV (Cox & Snell  $R^2 = 0.054$ ., Nagelkerke  $R^2 = 0.073$ ), see table of coefficients

**Table S4. Coefficients of predictors in the model from the Logistic Regression**

|                   | B      | S.E   | Wald  | d.f. | Sig.  | Exp(B) | 95% C.I for EXP (B) |       |
|-------------------|--------|-------|-------|------|-------|--------|---------------------|-------|
|                   |        |       |       |      |       |        | Lower               | Upper |
| BMQ-<br>Necessity | -0.045 | 0.090 | 0.249 | 1    | 0.618 | 0.956  | 0.802               | 1.140 |
| BMQ-<br>Concerns  | 0.130  | 0.100 | 1.681 | 1    | 0.191 | 1.131  | 0.936               | 1.385 |
| BMQ-<br>Harm      | -0.040 | 0.158 | 0.065 | 1    | 0.799 | 0.961  | 0.705               | 1.308 |
| BMQ-<br>Overuse   | 0.057  | 0.139 | 0.165 | 1    | 0.684 | 1.06   | 0.806               | 1.390 |
| Hesitancy         | -0.062 | 0.078 | 0.624 | 1    | 0.430 | 0.940  | 0.806               | 1.096 |
| BIPQ              | -0.032 | 0.028 | 1.361 | 1    | 0.243 | 0.968  | 0.917               | 1.022 |
| NCD               | -0.057 | 0.039 | 2.097 | 1    | 0.148 | 0.944  | 0.874               | 1.020 |

### **Supplementary Material S6: Quotations from Free-Text Responses**

**Table S5: Practical, Ambivalence, and Perceptual qualitative reasoning given for vaccine delay.**

| <b>Practical</b>                | <b>Ambivalence</b>                     | <b>Perceptual</b>                                      |
|---------------------------------|----------------------------------------|--------------------------------------------------------|
| <i>"shift work + covid pos"</i> | <i>"didn't think it was necessary"</i> | <i>"work, then unsure (didn't get 4<sup>th</sup>)"</i> |
| <i>"contracted covid"</i>       | <i>"got it for travel"</i>             | <i>"only took the vaccine whilst pregnant"</i>         |
| <i>"covid positive"</i>         |                                        | <i>"unsure whilst pregnant"</i>                        |
| <i>"covid pos"</i>              |                                        | <i>"hesitant"</i>                                      |
| <i>"covid positive"</i>         |                                        | <i>"anti-vaxx friends causing doubt"</i>               |
| <i>"covid positive"</i>         |                                        | <i>"pregnancy"</i>                                     |
| <i>"covid pos"</i>              |                                        |                                                        |
| <i>"covid positive"</i>         |                                        |                                                        |
| <i>"COVID POS"</i>              |                                        |                                                        |
| <i>"Couldn't book in"</i>       |                                        |                                                        |
| <i>"short staffed"</i>          |                                        |                                                        |
| <i>"Had Covid"</i>              |                                        |                                                        |

**Supplementary Material S7: Quantitative Questionnaire (Exported from [www.qualtrics.com](http://www.qualtrics.com))**

**Survey 1: Quantitative Questionnaire**

**Start of Block: Demographics**

Q1 Thank you for taking the time to fill in this survey. Please answer the following questions about yourself.

---

Page Break

Q2 How old are you?

- ☐ 18-25
- ☐ 26-35
- ☐ 36-45
- ☐ 46-55
- ☐ 56-65
- ☐ 66-75
- ☐ 75+

---

Q3 Which gender do you identify with?

- ☐ Male
  - ☐ Female
  - ☐ Other (Non-Binary, Agender)
-

Q4 What ethnicity would you describe yourself as?

- ☐ Black African
  - ☐ Black Caribbean
  - ☐ Asian Indian
  - ☐ Asian Pakistani
  - ☐ White British
  - ☐ White European
  - ☐ Chinese
  - ☐ Other (Please State) \_\_\_\_\_
- 

Q5 Did you work in the healthcare field during the COVID-19 pandemic?

- ☐ Yes
- ☐ No

*Skip To: End of Survey If Did you work in the healthcare field during the COVID-19 pandemic? = No*

---

Q6 In what healthcare profession did you work as during the COVID-19 pandemic?

- ☐ Nurse
  - ☐ Doctor
  - ☐ Healthcare Assistant
  - ☐ Pharmacist
  - ☐ Care/Support Worker
  - ☐ Non-patient Facing Role
  - ☐ Other (Please State) \_\_\_\_\_
- 

Q7 Which country within the UK do you currently live in?

- ☐ England
- ☐ Wales
- ☐ Scotland
- ☐ Northern Ireland
- ☐ Other (please specify) \_\_\_\_\_

End of Block: Demographics

---

Start of Block: BMQ-S

Q4 \*Your views about vaccines for yourself\*

We would like to ask you about your personal views about accepting the COVID-19 vaccination.

These are statements other people have made about vaccination. Please indicate the extent to which you agree or disagree with them by ticking the box.

There are no right or wrong answers. We are interested in your personal views.

---

Q1 'My health, at present, depends upon being vaccinated against COVID-19'

- ☐ Strongly agree
  - ☐ Agree
  - ☐ Neither agree nor disagree
  - ☐ Disagree
  - ☐ Strongly disagree
- 

Q2 'Having to accept COVID-19 vaccinations worries me'

- ☐ Strongly Agree
  - ☐ Agree
  - ☐ Neither agree nor disagree
  - ☐ Disagree
  - ☐ Strongly disagree
-

Q3 'My life would be impossible without being vaccinated against COVID-19'

- ☐ Strongly Agree
  - ☐ Agree
  - ☐ Neither agree nor disagree
  - ☐ Disagree
  - ☐ Strongly disagree
- 

Q4 'Without COVID-19 vaccination I would become very ill'

- ☐ Strongly Agree
  - ☐ Agree
  - ☐ Neither agree nor disagree
  - ☐ Disagree
  - ☐ Strongly disagree
- 

Q5 'I sometimes worry about the long-term effects of the COVID-19 vaccination'

- ☐ Strongly Agree
  - ☐ Agree
  - ☐ Neither agree nor disagree
  - ☐ Disagree
  - ☐ Strongly disagree
-



Q6 'COVID-19 Vaccination is a mystery to me'

- ☐ Strongly Agree
  - ☐ Agree
  - ☐ Neither agree nor disagree
  - ☐ Disagree
  - ☐ Strongly disagree
- 

Q7 'My health in the future will depend upon being vaccinated against COVID-19'

- ☐ Strongly Agree
  - ☐ Agree
  - ☐ Neither agree nor disagree
  - ☐ Disagree
  - ☐ Strongly disagree
- 

Q8 'COVID-19 vaccination has disrupted my life'

- ☐ Strongly Agree
  - ☐ Agree
  - ☐ Neither agree nor disagree
  - ☐ Disagree
  - ☐ Strongly disagree
-

Q9 'I sometimes worry about becoming too dependent on the COVID-19 vaccinations'

- ☐ Strongly Agree
- ☐ Agree
- ☐ Neither agree nor disagree
- ☐ Disagree
- ☐ Strongly disagree
- 

Q10 'Vaccination against COVID-19 protects me'

- ☐ Strongly Agree
- ☐ Agree
- ☐ Neither agree nor disagree
- ☐ Disagree
- ☐ Strongly disagree

End of Block: BMQ-S

---

Start of Block: BMQG

Q14 Your views about vaccinations in general

We would like to ask you about your personal views about vaccinations in general.

These are statements other people have made about medicines in general. Please indicate the extent to which you agree or disagree with them by ticking the appropriate box.

There are no right or wrong answers. We are interested in your personal views.

---

Q11 Vaccinations are recommended too freely'

- ☐ Strongly Agree
  - ☐ Agree
  - ☐ Neither agree nor disagree
  - ☐ Disagree
  - ☐ Strongly disagree
- 

Q12 'People should think hard about whether they want to become vaccinated'

- ☐ Strongly Agree
  - ☐ Agree
  - ☐ Neither agree nor disagree
  - ☐ Disagree
  - ☐ Strongly disagree
- 

Q13 'Vaccination is not necessary'

- ☐ Strongly Agree
  - ☐ Agree
  - ☐ Neither agree nor disagree
  - ☐ Disagree
  - ☐ Strongly disagree
-

Q14 'Natural remedies are safer than vaccinations'

- ☐ Strongly Agree
  - ☐ Agree
  - ☐ Neither agree nor disagree
  - ☐ Disagree
  - ☐ Strongly disagree
- 

Q15 'Vaccination does more harm than good'

- ☐ Strongly Agree
  - ☐ Agree
  - ☐ Neither agree nor disagree
  - ☐ Disagree
  - ☐ Strongly disagree
- 

Q16 'Vaccinations are poisons'

- ☐ Strongly Agree
  - ☐ Agree
  - ☐ Neither agree nor disagree
  - ☐ Disagree
  - ☐ Strongly disagree
-

Q17 'Doctors place too much trust in vaccinations'

- ☐ Strongly Agree
  - ☐ Agree
  - ☐ Neither agree nor disagree
  - ☐ Disagree
  - ☐ Strongly disagree
- 

Q18 'If doctors spent more time with patients they would be less likely to recommend vaccinations'

- ☐ Strongly Agree
- ☐ Agree
- ☐ Neither agree nor disagree
- ☐ Disagree
- ☐ Strongly disagree

End of Block: BMQG

---

Start of Block: BIPQ

Q1 For the following questions, please select the number that best corresponds to your views:

[illegible]

Q2

[illegible]

Q3

[illegible]

Q4

|                                                                          | 0 -<br>not<br>at all  | 1                     | 2                     | 3                     | 4                     | 5                     | 6                     | 7                     | 8                     | 9                     | 10 -<br>extremely<br>helpful     |
|--------------------------------------------------------------------------|-----------------------|-----------------------|-----------------------|-----------------------|-----------------------|-----------------------|-----------------------|-----------------------|-----------------------|-----------------------|----------------------------------|
| How much do you think that treatment can help with symptoms of COVID-19? | <input type="radio"/> | <input checked="" type="radio"/> |

Q4

[illegible]

Q5

[illegible]

Q6

[illegible]



Q7

|                                                | 0 - not at all affected? | 1                     | 2                     | 3                     | 4                     | 5                     | 6                     | 7                     | 8                     | 9                     | 10 - extremely affected |
|------------------------------------------------|--------------------------|-----------------------|-----------------------|-----------------------|-----------------------|-----------------------|-----------------------|-----------------------|-----------------------|-----------------------|-------------------------|
| How much does COVID-19 affect you emotionally? | <input type="radio"/>    | <input type="radio"/> | <input type="radio"/> | <input type="radio"/> | <input type="radio"/> | <input type="radio"/> | <input type="radio"/> | <input type="radio"/> | <input type="radio"/> | <input type="radio"/> | <input type="radio"/>   |

End of Block: BIPQ

Start of Block: VHS

Q1 If another COVID-19 vaccine booster was made available, would you take it?

- ☐ Definitely
  - ☐ Probably
  - ☐ I may or may not
  - ☐ Probably not
  - ☐ Definitely not
  - ☐ I don't know
-

Q2 If another COVID-19 vaccine booster was made available:

- ☐ I will want to get it as soon as possible
  - ☐ I will take it when offered
  - ☐ I'm not sure what I will do
  - ☐ I will delay getting in
  - ☐ I will refuse to get it
  - ☐ I don't know
- 

Q3 When the COVID-19 vaccine first became available (in January 2021), I would describe my attitude towards it as:

- ☐ Very keen
  - ☐ Pretty positive
  - ☐ Neutral
  - ☐ Quite uneasy
  - ☐ Against it
  - ☐ I don't know
-

Q4 If another COVID-19 booster vaccine was available at my local pharmacy, I would:

- ☐ Get it as soon as possible
  - ☐ Get it when I have time
  - ☐ Delay getting it
  - ☐ Avoid getting it for as long as possible
  - ☐ Never get it
  - ☐ I don't know
- 

Q5 If my family or friends were thinking of getting a COVID-19 vaccination, I would:

- ☐ Strongly encourage them
  - ☐ Encourage them
  - ☐ Not say anything to them about it
  - ☐ Ask them to delay getting the vaccination
  - ☐ Suggest that they don't get the vaccination
  - ☐ I don't know
-

Q6 I would describe myself as:

- ☐ Strongly favorable towards the COVID vaccine
  - ☐ Favorable towards the vaccine
  - ☐ Neutral towards the vaccine
  - ☐ Hesitant towards the vaccine
  - ☐ Anti-vaccination for the COVID vaccine
  - ☐ I don't know
- 

Q7 Accepting a COVID vaccination is:

- ☐ Really important
- ☐ Important
- ☐ Neither important nor unimportant
- ☐ Unimportant
- ☐ Really unimportant
- ☐ I don't know

End of Block: VHS

---

Start of Block: NM

Q1 How many doses of the COVID-19 vaccination have you currently received?

☐ 0

☐ 1

☐ 2

☐ 3

☐ 4

---

Q2 We are interested in finding out if you delayed receiving the COVID-19 vaccination for any reason. For each dose, type the date of the appointment and the date you received the vaccine. If you have not been vaccinated, please put Not Applicable for each dose

☐ First Dose - Month of appointment given: (N/A if not vaccinated)

\_\_\_\_\_

☐ First Dose - How many weeks following this appointment did you receive the vaccine? (0 if received vaccine on first date given)

\_\_\_\_\_

☐ Reason for delay, if any: \_\_\_\_\_

☐ Second dose - Month of appointment given (N/A if not vaccinated):

\_\_\_\_\_

☐ Second dose - How many weeks following this appointment did you receive the vaccine? (0 if received vaccine on first date given)

\_\_\_\_\_

☐ Reason for delay, if any: \_\_\_\_\_

☐ Third dose - Month of appointment given (N/A if not vaccinated):

\_\_\_\_\_

☐ Third dose - How many weeks following this appointment did you receive the vaccine? (0 if received vaccine on first date given)

\_\_\_\_\_

☐ Reason for delay, if any: \_\_\_\_\_

☐ Fourth Dose Offered? \_\_\_\_\_

☐ Month of appointment: \_\_\_\_\_

☐ How many weeks following this appointment given did you receive the vaccine? (0 if received vaccine on first date given)

\_\_\_\_\_

☐ Reason for delay (if any):

\_\_\_\_\_

End of Block: NM
